RESEARCH ARTICLE

# Mule deer spatial association patterns and potential implications for transmission of an epizootic disease

María Fernanda Mejía-Salazar<sup>1\*</sup>, Anne W. Goldizen<sup>2</sup>, Clementine S. Menz<sup>2</sup>, Ross G. Dwyer<sup>2</sup>, Simon P. Blomberg<sup>2</sup>, Cheryl L. Waldner<sup>1</sup>, Catherine I. Cullingham<sup>3</sup>, Trent K. Bollinger<sup>1,4</sup>

**1** Western College of Veterinary Medicine, University of Saskatchewan, Saskatoon, Saskatchewan, Canada, **2** School of Biological Sciences, University of Queensland, Brisbane, Queensland, Australia, **3** Department of Biological Sciences, University of Alberta, Edmonton, Alberta, Canada, **4** Canadian Wildlife Health Cooperative (CWHC), Saskatoon, Saskatchewan, Canada

\* [mihicoltia@gmail.com](mailto:mihicoltia@gmail.com)

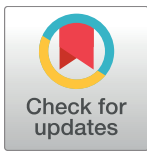

**OPEN ACCESS**

**Citation:** Mejía-Salazar MF, Goldizen AW, Menz CS, Dwyer RG, Blomberg SP, Waldner CL, et al. (2017) Mule deer spatial association patterns and potential implications for transmission of an epizootic disease. PLoS ONE 12(4): e0175385. <https://doi.org/10.1371/journal.pone.0175385>

**Editor:** Cheryl S. Rosenfeld, University of Missouri Columbia, UNITED STATES

**Received:** August 17, 2016

**Accepted:** March 24, 2017

**Published:** April 7, 2017

**Copyright:** © 2017 Mejía-Salazar et al. This is an open access article distributed under the terms of the [Creative Commons Attribution License](https://creativecommons.org/licenses/by/4.0/), which permits unrestricted use, distribution, and reproduction in any medium, provided the original author and source are credited.

**Data Availability Statement:** Data found in [S1 Appendix](#) can be used to duplicate all the analyses performed in this manuscript.

**Funding:** This project was funded primarily by PrioNet Canada a Network of Centres of Excellence of Canada ([www.nce-rce.gc.ca](http://www.nce-rce.gc.ca)). Additional funding and support was provided by Saskatchewan Ministry of Environment (<http://environment.gov.sk.ca/>) and the Canadian Wildlife Health Cooperative (<http://www.ccwhc.ca/>). MFMS received a scholarship funding from the Consejo

## Abstract

Animal social behaviour can have important effects on the long-term dynamics of diseases. In particular, preferential spatial relationships between individuals can lead to differences in the rates of disease spread within a population. We examined the concurrent influence of genetic relatedness, sex, age, home range overlap, time of year, and prion disease status on proximal associations of adult Rocky Mountain mule deer (*Odocoileus hemionus hemionus*) in a chronic wasting disease endemic area. We also quantified the temporal stability of these associations across different sex, age, and disease status classes. We used three years of high frequency telemetry data from 74 individuals to record encounters within 25 m of each other, and to calculate seasonal home range overlap measured by volume of intersection (VI). The strength of pairwise spatial association between adult mule deer was independent of genetic relatedness, age and disease status. Seasonal variation in association strength was not consistent across years, perhaps due to annual changes in weather conditions. The influence of home range overlap on association strength varied seasonally, whereby associations were stronger in pre-rut and fawning than in the rest of the seasons. The sexes of individuals also interacted with both VI and season. At increasing levels of VI, associations were stronger between females than between males and between females and males. The strongest associations in pre-rut were between males, while the strongest in rut were between females and males. The temporal stability of associations was markedly dependant on the sex and the diagnosis of the associating pair. Our findings highlight the importance of considering concurrent effects of biological and environmental factors when seeking to understand the role of social preference in behavioural ecology and disease spread. Applying this knowledge in epidemiological modelling will shed light on the dynamics of disease transmission among mule deer.

Nacional de Ciencia y Tecnología (CONACYT) (<http://www.conacyt.mx>). The funders had no role in study design, data collection and analysis, decision to publish, or preparation of the manuscript.

**Competing interests:** The authors have declared that no competing interests exist.

## Introduction

The likelihood and duration of associations between individuals are influenced by social structure, inter-group mixing and the size and composition of social groups [1, 2]. As well as influencing the transfer of information throughout a population, the properties of such associations can also affect the rate of spread of infectious diseases [3]. For social species, epidemiological models that assume all hosts have equal probability of association and disease transmission, and that ignore seasonal variation, are no longer considered suitable for the study of complex diseases [4, 5]. To enhance models to guide disease control, studies are needed to quantify the extent to which individuals choose whom to associate with and factors relating to these choices.

Chronic wasting disease (CWD) affects farmed and free-ranging mule deer (*Odocoileus hemionus*) and other cervids in USA and Canada, and most recently free-ranging reindeer (*Rangifer tarandus tarandus*) and moose (*Alces alces*) in Norway. It is a fatal, neurodegenerative, contagious prion disease that is expected to reduce mule deer population sizes [6, 7]. Furthermore, it is proving extremely difficult to eradicate once established within wild populations [8]. The complexity of this disease is due to its transmission through both animal-to-animal contact and through the environment, its lengthy infectious period (>1.5 years), and the persistence of prions in the environment for at least 2.5 years [9, 10]. These factors highlight the need for detailed information on mule deer social behaviour and the dynamics of prions in the environment [5, 11] to parameterise dynamic disease models and inform cervid population management programs. The validity of CWD transmission model outcomes is reliant on accurate parameter estimates that describe deer sociality. While there have been relevant studies done on association patterns among female white-tailed deer (*Odocoileus virginianus*) [4, 12] and their home range establishment [13], it is important to collect data specific to mule deer and to both sexes.

Several factors are known to relate to how individuals socialise. When associations are defined based on two individuals being in the same area, a correlation between home range overlap and spatial association strength is expected. However, associations are not driven solely by home range overlap, but also by complex preferences and avoidances (e.g. [14]). Kin-biased associations in various taxa respond flexibly to changes in ecological context, such as local demography and resource abundance [15]. This is probably why genetic relatedness sometimes correlates with association patterns (e.g. [14, 16]) and sometimes does not (e.g. [17, 18]). Among cervids, red deer (*Cervus elaphus*) preferentially associate with kin [19], while genetic relatedness does not determine social structure of elk (*Cervus canadensis*) [20].

Sex and age of the individuals, as well as time of the year, affect the number, type and duration of relationships [21], (e.g. [22]). Disease can also influence social relationships through strategies that restrict pathogen spread, such as behavioural immunity [23] and sickness behaviour [24]. For example, deer infected with CWD have a reduced likelihood of being found in groups [25], probably as a result of behavioural changes caused by brain injury (e.g. diminished alertness, and ataxia) [26]. The clinical phase lasts from a few weeks to about four months under experimental conditions [27] and from a few months to a year based on our field observations (Mejía-Salazar, unpublished data). Studies on sociality that consider the concurrent effects of home range overlap, kinship, and seasonality, as well as life history characteristics, are therefore necessary to understand the role of preference in social organisation and in the dynamics of disease transmission.

The social life of mule deer is characterized by decisions that change dynamically over time, because ecological context, and group size and composition change on a daily basis [25]. Mule deer have a marked right-skewed distribution of group sizes [25] with obvious seasonality

driven by environmental conditions and reproductive behaviour [25, 28–31]. The largest mixed-sex groups are observed in winter, while the smallest are seen during the fawning period [25, 29]. In our study area, open flat habitat is associated with larger groups and a greater frequency of close proximity events (deer within 25 m of each other), while rugged terrain is used by many individuals in small groups [25, 28].

Our first aim was to determine whether a range of factors, including sex, age, CWD status, spatial overlap, genetic relatedness and time of the year, all concurrently influenced the strength of pairwise associations. Our second aim was to test for sex, age and CWD status differences in the temporal stability of spatial associations. To answer these questions, we used spatial and genetic data to investigate patterns of associations among pairs of mule deer in a CWD endemic area. Our findings can serve to clarify aspects of cervid social behaviour that in turn can complement future epidemiological modelling to guide CWD management strategies.

## Methods

### Study population

The study was conducted between April 2009 and March 2012 in Antelope Creek (50.66°N, 108.27°W), a rural area within the mixed grassland ecoregion in southern Saskatchewan, Canada. The size of the core study area was defined by the movement of radio-collared deer, and was approximately 258 km<sup>2</sup> (Fig 1A). The north section of the area is limited by the South Saskatchewan River and is characterized by a network of coulees with rugged terrain and natural vegetation. This network is surrounded by predominantly agricultural cropland. The climate is semiarid with long and rigorous winters with mean extreme maximum and minimum temperatures of 35.1°C and -34.2°C, respectively [32]. The population of mule deer in the study area was estimated to range from 322 to 422 mule deer in 2007 and 2009, and was mostly (67%) non-migratory [33], with a mean group size of 3.5 (SD = 3.7, range = 1 to 29) and a typical group size of 7.3 (95% CI = 6.8 to 8.1) [25]. In Antelope Creek, CWD was first recognized in an elk farm in 1998, and then it was detected in wild mule deer in 2000. The prevalence in adult mule deer has substantially increased in Saskatchewan since 2004 [34].

### Data collection

Our animal handling protocol adhered to the Canadian Council on Animal Care guidelines for humane animal use and was approved by the University of Saskatchewan's Animal Research Ethics Board (Permit number 20050135). Permits to conduct research within private land of the study area were obtained verbally from land owners. A permit to conduct research within the Cabri Regional Park (50.66824°N -108.26791°W) was obtained from The Saskatchewan Regional Parks Association.

We captured mule deer in February or March of 2009, 2010 and 2011 using a helicopter and net-gun [37], or less frequently using Clover traps [38]. Upon capture, deer were chemically immobilized as described by Silbernagel et al. [28]. We collected a 5 mm ear biopsy for genetic analysis. We aged deer based on tooth wear and replacement [39]. Deer are usually classified as adults at 24 months of age [40]; however, we classified deer as adults from 21 months old, as that was their age when we did our annual captures. Immunohistochemical (IHC) staining on palatine tonsil and sometimes rectal biopsies obtained during capture were used to classify the CWD status of live individuals in one of three categories: negative (no immunolabeling in at least 5 lymphoid follicles), positive (immunolabeling in any number of lymphoid follicles), or inconclusive (fewer than 5 lymphoid follicles in the sample) [41, 42]. A minimum of 5 lymphoid follicles in the sample were required to ensure >95% probability of

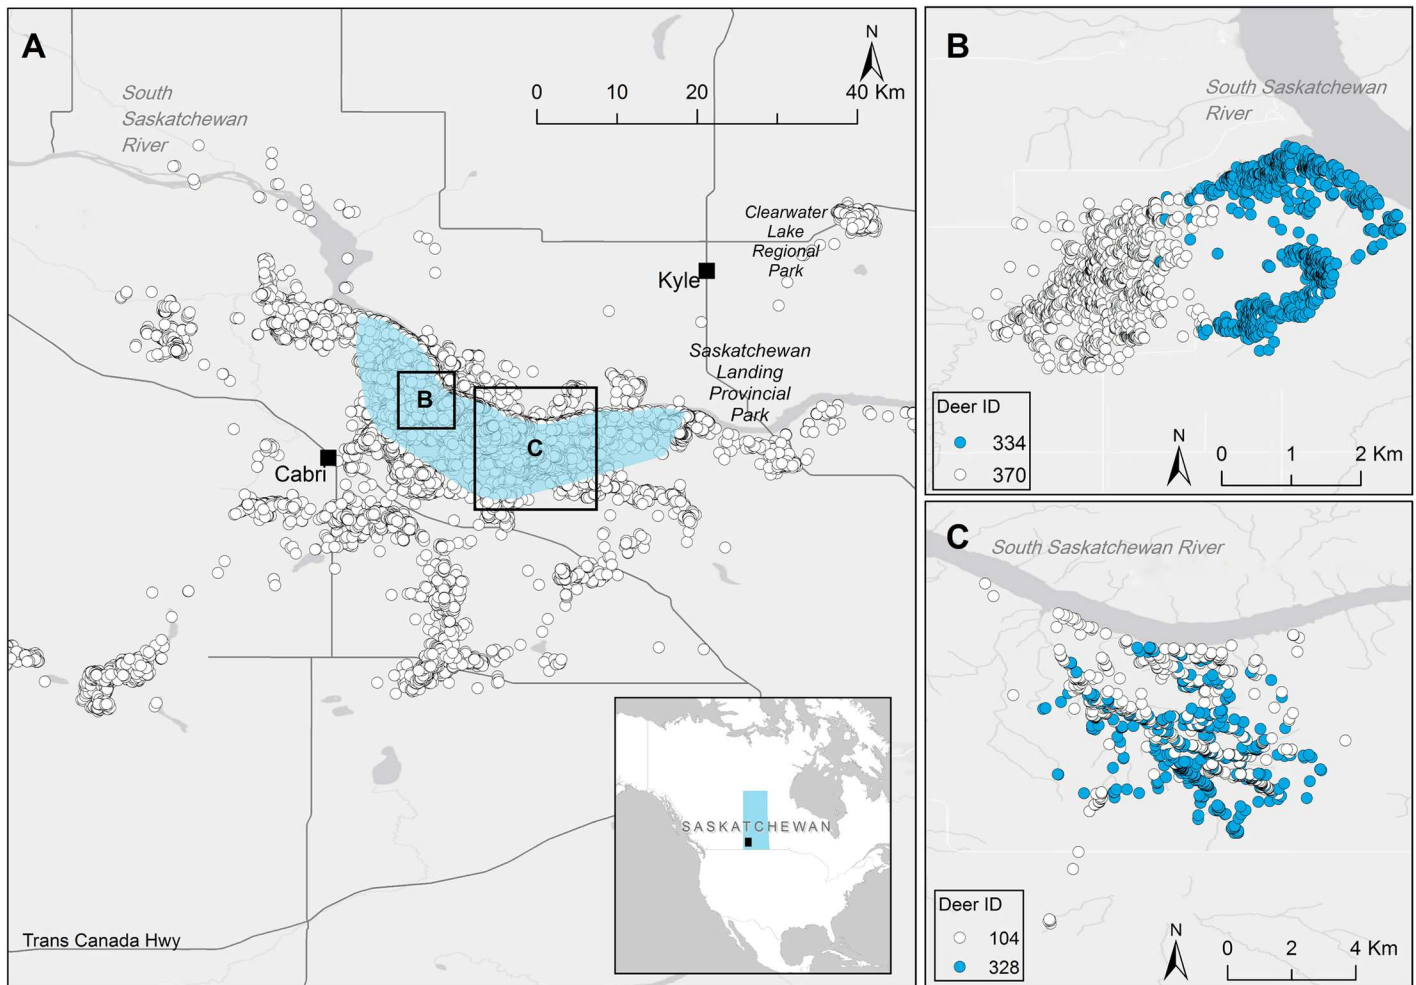

**Fig 1. Representation of the study area, and examples of preference and avoidance between individuals.** (A) Detail: a map of North America with Saskatchewan in a blue rectangle and the approximate location of the study area in a black rectangle. Map: a close-up of the study area. The vast majority of radio-collared deer moved within a core area (blue polygon) that measured approximately 258 km<sup>2</sup>. Seven individuals relocated to small areas outside the core area for few weeks in a year; the sum of those regions was 44 km<sup>2</sup>. (B) Example of two adult females showing preference for one another during pre-rut in 2010. Even though the volume of intersection (VI) of their home ranges was only 2%, their association index was 1. This means that they were within 25 m of one another at least once a day, every day during that season. (C) Example of two adult males showing avoidance during rut in 2011. This means that despite a VI of 53%, they were not found in close proximity at any time during that season (association index = 0). The maps were created using ArcGIS® software by ESRI [35]; position and arrangement of road networks were obtained from Statistics Canada [36].

<https://doi.org/10.1371/journal.pone.0175385.g001>

an accurate test [43]. By using this criterion, we reduced the chance of misclassifying a deer as negative due to repeated sampling or increasing age [43, 44]. When the diagnosis was inconclusive, re-cuts of the tonsil and in some cases of rectal biopsies were tested until a final diagnosis was achieved. In spite of retesting, 5 individuals were diagnosed as inconclusive for one year, but were negative when resampled at a later date. These deer were considered negative for all the years previous to the CWD negative result. For dead animals, IHC was performed on portions of obex, tonsil and/or retropharyngeal lymph node. Known positive deer were not removed from the population because data obtained from long-term intensive monitoring of both infected and healthy individuals was considered to be more valuable for epidemiological purposes than removing a few infected individuals from this population. Disease and population control programs in the study area, based on hunting, were not interrupted during the duration of this project and some collared deer were shot by hunters.

Adults were fitted with global positioning system (GPS) radio-collars (Lotek Wireless, Ontario, Canada) that were programmed to record position at predetermined 2 h intervals throughout the day (all at the same times). We released the deer close to their original capture location. Each year, CWD negative deer were re-captured, re-tested, and fitted with a new collar. Deer that tested positive were not re-captured. Data from defective collars were not included in the analyses (Table 1).

## Data analysis

**Defining study periods.** A study year was defined by the capture period, and ran from 1 April of one year to 31 March of the next year. For this study, we included 3 years of data from 1 April 2009 to 31 March 2012, with each year divided into 5 seasons (Table 2) [25, 28, 32, 45].

**Age, sex and disease status.** We classified adult mule deer based on age (young adult if 1.8 to 3 years old, or old adult if >3 years old), sex (female or male), and CWD diagnosis (negative, positive, or sick). Deer were assumed to be positive for CWD from the first day of the season in which the sample was taken. For example, if a sample taken on 20 Feb was positive, that deer was considered positive since 16 Dec. All deer were directly observed at least once a month (positive deer at least twice a month) and were considered sick from the moment they showed clear clinical signs of CWD, which included some or all of the following: drooping ears and head, laterally wide feet stance, hocks touching, protruding ribs and ischial tuberosities, reduced alertness, and difficulty in following a group or standing or eating [46]. Deer were considered negative until the season in which they tested positive.

**Genetic relatedness.** Genomic DNA was extracted from ear biopsies of most captured individuals. We genotyped each sample at 16 microsatellite loci following Cullingham et al. [47]. Samples with  $\geq 3$  missing loci were discarded. Pairwise relatedness measures were estimated for 211 mule deer in the study area, including deer from other research projects, in SPAGeDi version 1.4 [48] using the estimator of Queller & Goodnight [49]. This genetic relatedness coefficient (range from -1 to 1) is an unbiased estimate of relatedness based on the population's allele frequencies. A positive value indicates that a pair is more related, and a negative value indicates that a pair is less related, than average for the sampled population [49].

**Analysis of associations.** Analysis of pairwise associations was based on radio-telemetry data from adult mule deer with GPS collars (96 different deer in the 3 years) (Table 1). Two individuals were considered associated if they were simultaneously located within 25 m from each other. We chose this threshold to account for collar error, which was 10.3 m on average ( $n = 16$ , range = 5.0 to 19.6 m) [28]. To obtain a list of all associated dyads per GPS-fix (i.e. every 2 hours) per season, we used the adehabitatHR package [50, 51] for R. Associations detected within the first 2 weeks after capture were discarded to exclude data that might be affected by behavioural changes related to capture. For the final dataset, deer were considered to be associated on a particular day if they were associated during at least one of the 2-hourly

**Table 1. Number of adult ( $\geq 21$  months old) mule deer fitted with GPS collars, by sex and CWD diagnosis.** Of 96 unique individuals (some deer were studied in more than one year), data from 74 were suitable for analyses of association strength, given available data on their genetics and locations.

|                  | 2009 | 2010 | 2011 |  |
|------------------|------|------|------|--|
| Positive females | 5    | 4    | 14   |  |
| Negative females | 21   | 14   | 12   |  |
| Positive males   | 4    | 3    | 14   |  |
| Negative males   | 12   | 4    | 20   |  |
| Total            | 42   | 25   | 60   |  |

<https://doi.org/10.1371/journal.pone.0175385.t001>

**Table 2. Seasons as defined according to mule deer biology and weather.**

| Season name (abbreviation) | Start and end dates | Description                                                                                                                                                                                                                                              |
|----------------------------|---------------------|----------------------------------------------------------------------------------------------------------------------------------------------------------------------------------------------------------------------------------------------------------|
| Late gestation (LG)        | 1 Apr-15 May        | Males separate from females and fawns, and form bachelor groups (the largest in the year). The frequency of cold temperatures (0 to 10°C) starts to decrease.                                                                                            |
| Fawning (F)                | 16 May-31 Jul       | Smallest groups in the year. Fawns from the previous year start separating from their mother's group. Females give birth in synchrony, isolating themselves to give birth. Ambient warm temperatures (24 to 29°C) reach their highest point of the year. |
| Pre-rut (PR)               | 1 Aug-31 Oct        | Females without fawns are in small groups. Mothers with fawns start to allow other sex and age classes to join them. More frequent male-male interactions in preparation for rut. Warm ambient temperatures start to decrease.                           |
| Rut (R)                    | 1 Nov-15 Dec        | Oestrus begins. Males become more active to gain breeding access. Freezing ambient temperatures (-10 to 0°C) are the most common.                                                                                                                        |
| Early gestation (EG)       | 16 Dec-31 Mar       | The largest mixed-sex herds of the year are formed. Largest female groups of the year. Snow fall peaks and the ambient temperatures are the lowest of the year (below -10°C).                                                                            |

<https://doi.org/10.1371/journal.pone.0175385.t002>

fixes. We calculated the strengths of dyadic associations among all pairs for each season using data files in linear mode and sampling periods of 1 day in SOCPROG 2.6 [52, 53]. As new deer would enter the sample with each collar deployment, while others left due to death or collar failure, we used the social affinity index as the association index because this measure helps to control for such demographic changes (pg. 98 in [21]) [54]. We calculated social affinity indices with this formula:  $x / \text{Min}\{(x + y_{AB} + y_A), (x + y_{AB} + y_B)\}$ , where  $x$  is the number of sampling days that A and B were observed together; Min stands for minimum and indicates that  $x$  will be divided by whichever of the 2 terms separated by the comma is smaller;  $y_A$  is the number of sampling days that A was observed without B,  $y_B$  is the number of sampling days that B was observed without A, and  $y_{AB}$  is the number of sampling days in which A and B were both observed, but not together (pg. 98 in [21]), [54]. The index ranges from 0 (deer never detected together within the season) to 1 (deer detected together every day of the season).

**Calculation of volume of intersection (VI).** We estimated home range size for each individual for each season using the Brownian bridge kernel method [55, 56] in adehabitatHR package [50, 57] for R. This method estimates the utilization distribution of an animal when locations are autocorrelated, which was the case for our data collected every 2 hours. It considers both the positions of the fixes, the path travelled by the animal, and the time dependence between successive fixes [55, 56]. For the final calculations, we excluded fixes within the first 2 weeks after capture, and sequential fixes indicating a movement velocity greater than 2 km/h (an unlikely rate of movement for this species [33, 58]). We used an approach defined by Horne et al. [56] to find the maximum likelihood estimation of the parameter sig1 (a parameter to compute the variance of the position) for every deer and every season. We used a sig2 (location error) of 10 m based on collar accuracy [28], and a grid resolution of 200 m. The areas of home range overlap between deer pairs per season were calculated using adehabitatHR package [57] for R following the volume of intersection (VI) method [59]. This provides a single measure of the VI between the Brownian bridge kernel home ranges of two individuals, per season. The VI ranges from 0 (when two home ranges have no overlap) to 1 (when two individuals have identical utilization distributions). As this method overcomes assumptions about random space use within a home range [59], it produces more biologically meaningful results than simpler measures of areas of overlap.

**Aim 1: Factors relating to association strength.** To investigate the effects of multiple factors on association strength, we built a dataset of all seasonal pairwise associations, excluding records in which both the association index and VI were 0, and records with  $VI < 0.01$  (10 of those 1272 records had association indices of 0.02 to 0.2; the rest had values of 0). We did this to exclude cases in which deer did not have the opportunity to associate. Using the dataset in [S1 Appendix](#), worksheet `association_strength_data`, we built a set of 15 *a priori* linear mixed effects models using our knowledge of mule deer biology and behaviour ([Table 3](#)). The response variable was social affinity index, which was arcsined square-root transformed ( $\text{asin}(\sqrt{\text{index}})$ ). All inferences were made on the transformed data. The predictor variables included different combinations of season, year, sex (sexes of the pair; e.g. FF for a pair of females), age (ages of the pair; e.g. YY for a pair of young adults), diagnosis (CWD diagnoses of the pair; e.g. SP for a pair of a sick and a positive deer), genetic relatedness, VI, and biologically meaningful 2-way interaction effects. We assigned each dyad a unique code, and treated dyad as a random effect. We used `lme4` [60] and `MuMIn` [61] packages for R [62] to fit these models. Estimates of the relative importance of each predictor variable were calculated by summing the Akaike weights across all models in the set in which the variable occurred (pg. 167 in [63]). We selected the best model based on the Akaike weights (sum is just  $\geq 0.95$ ), and the delta  $\Delta_p$  ( $\Delta_p$  is  $\leq 5$ ;  $\Delta_p$  is the difference between AICc from the best model and the next model) (pg. 168 in [63]). We obtained least squares means (LSmeans) to evaluate statistical differences ( $P < 0.05$ ) using Bonferroni correction for multiple comparisons [64]. We report results on back-transformed association indices as predicted by the best model.

**Aim 2: Temporal patterns of associations.** To test for sex, age and CWD status differences in temporal stability of associations among adult mule deer, we analysed lagged association rates (LARs) in SOCPROG 2.6. LARs are estimates of the probability of association  $t$  time

**Table 3. Summary of 15 *a priori* models of mule deer association indices in Antelope Creek, Saskatchewan, Canada.**

| Predictor variable | Model ID |   |   |   |   |   |   |   |   |    |    |    |    |    |    |
|--------------------|----------|---|---|---|---|---|---|---|---|----|----|----|----|----|----|
|                    | 1        | 2 | 3 | 4 | 5 | 6 | 7 | 8 | 9 | 10 | 11 | 12 | 13 | 14 | 15 |
| Season             | X        | X | X | X | X | X | X | X | X | X  | X  | X  | X  | X  | X  |
| Year               | X        | X | X | X | X | X | X | X | X | X  | X  | X  | X  | X  | X  |
| Sex                | X        | X | X | X |   |   | X | X |   | X  | X  | X  |    | X  | X  |
| Diagnosis          | X        |   | X |   | X |   |   | X |   | X  | X  |    | X  |    |    |
| VI                 | X        |   | X |   |   | X | X | X | X |    | X  | X  | X  | X  | X  |
| Age                | X        |   |   | X | X | X |   |   |   |    | X  | X  | X  |    |    |
| Relatedness        | X        |   |   |   |   |   | X | X |   | X  |    |    |    |    |    |
| Season*year        | X        | X | X | X | X | X | X | X | X | X  | X  | X  | X  | X  | X  |
| Season*diagnosis   | X        |   | X |   | X |   |   | X |   | X  | X  |    |    |    |    |
| Sex*relatedness    | X        |   |   |   |   |   | X | X |   | X  |    |    |    |    |    |
| Season*VI          | X        |   | X |   |   | X | X | X | X |    | X  | X  | X  | X  | X  |
| Diagnosis*sex      | X        |   | X |   |   |   |   | X |   | X  | X  |    |    |    |    |
| VI*diagnosis       | X        |   | X |   |   |   |   | X |   |    | X  |    |    |    |    |
| Sex*age            |          |   |   |   |   |   |   |   |   |    |    | X  |    |    |    |
| Sex*season         |          |   |   |   |   |   |   |   |   |    |    | X  |    | X  | X  |
| Sex*VI             |          |   |   |   |   |   |   |   |   |    |    |    |    |    | X  |

Predictor variables considered in each model are indicated with an X. Terms with an \* are 2-way interactions. VI = volume of intersection.

<https://doi.org/10.1371/journal.pone.0175385.t003>

units after a previous association, averaged over all associations [21, 65]. We only included individuals for which we had continuous GPS-telemetry data from April 1<sup>st</sup> 2011 to March 31<sup>st</sup> 2012 (i.e. study year 2011). Of the 44 mule deer included in the analyses, there were 21 females and 23 males, 16 young adults and 28 old adults, and 12 CWD-negatives and 32 CWD-positives. CWD-positives were those that started the year with a positive diagnosis ( $n = 17$ ) plus those that became positive during the year ( $n = 15$ ). For this analysis, we did not classify deer as sick, as none showed clinical signs for the whole year. We investigated the between- and within-class lagged association rates (pg. 89 in [21]), for these class combinations: female-female (FF,  $n = 50$ ), male-male (MM,  $n = 122$ ) and female-male (FM,  $n = 172$ ) pairs; old-old (OO,  $n = 124$ ), young-young (YY,  $n = 45$ ) and old-young (OY,  $n = 175$ ) pairs; and positive-positive (PP,  $n = 190$ ), negative-negative (NN,  $n = 20$ ) and positive-negative (PN,  $n = 134$ ) pairs. LAR\_2011\_data and LAR\_attributes (S1 Appendix) were used to carry out the analyses between classes in SOCPROG 2.6. We set the sampling period as “date” (i.e. 1 day), defined associations as “grouped in sampling period”, and entered the class variables (e.g. LARs from females to males). Then, a set of 7 mathematical models was fitted simultaneously to the observed LARs (Table C in S2 Appendix). These models were of the exponential family and were composed of all, one, or any meaningful combination of three components: rapid disassociations (associations lasting 1 day at most), casual acquaintances (associations that decay over time; their rate of decay is given by  $a_1$  and the average duration is approximated from the exponent of the exponential function, e.g.  $1/a_1$ , in days), and constant companionships (associations that do not decay or increase over time; their duration is interpreted within the context of the study period, in this case 1 year) [65]. For each of the class pairs, the best fitting and most parsimonious model was indicated by the smallest quasi-Akaike information criterion (QAIC). If the difference between the QAIC of any other model and the best model,  $\Delta QAIC$ , went from 0 to 2, then there was substantial support for that other model [66]. The estimates of precision for the association rates and their durations were calculated with a Jackknife procedure over 3-day periods, and in some cases (MM, YY and PP) over 30, 45 and 10-day periods, respectively, to obtain better estimates [53]. LARs were compared to a null association rate (NAR), the expected LAR if animals had associated randomly [66].

## Results

### Aim 1: Factors affecting association strength

Between 2009 and 2011, 96 adult mule deer were fitted with GPS collars collecting data every 2 h, 24 h a day. Of these, data from 74 deer were suitable for analyses, given available paired data on both their genetics and locations. Association indices among these 74 deer were on average 0.12 (SE = 0.004, range 0 to 1). Most (58.7%) pairs' association indices were 0, 23.9% were 0.01 to 0.25, 15.8% were 0.26 to 0.99, and 1.6% were 1. Genetic relatedness was on average -0.003 (SE = 0.005, SD = 0.15, range -0.4 to 0.6). VI of the population was on average 0.17 (SE = 0.003, range 0.01 to 0.95). Preferences for others (i.e. association indices of 1) occurred with a VI as low as 0.02 (Fig 1B), and avoidances (i.e. association indices of 0) occurred when pairs had a VI as high as 0.53 (Fig 1C).

After fitting the *a priori* models predicting strength among adult mule deer, predictor variables were ranked based on their importance (Table 4), and the models were ranked by AICc (Table 5). Based on the Akaike weights and the delta  $\Delta_p$ , model 15 was clearly superior to the rest (delta = 0, weight = 0.9999) (Table 5). This model included the following statistical significant (all  $P < 0.0001$ ) fixed effects: season, year, VI, sex, and four interaction terms—season\*year, season\*sex, season\*VI and sex\*VI (S3 Appendix). The age, CWD status, and genetic



**Table 4. Predictor weights used to assess the relative importance of an individual covariate within a model.**

| Predictor variable | Predictor weight <sup>a</sup> | Number of models <sup>b</sup> |
|--------------------|-------------------------------|-------------------------------|
| Season             | 1                             | 15                            |
| Year               | 1                             | 15                            |
| Season*year        | 1                             | 15                            |
| VI                 | 1                             | 11                            |
| Sex                | 1                             | 11                            |
| Season*VI          | 1                             | 11                            |
| Season*sex         | 1                             | 3                             |
| Sex*VI             | 1                             | 1                             |
| Age                | < 0.01                        | 7                             |
| Age*sex            | < 0.01                        | 1                             |
| Diagnosis          | < 0.01                        | 7                             |
| Diagnosis*season   | < 0.01                        | 6                             |
| Diagnosis*sex      | < 0.01                        | 5                             |
| Relatedness        | < 0.01                        | 4                             |
| Relatedness*sex    | < 0.01                        | 4                             |
| Diagnosis*VI       | < 0.01                        | 4                             |

a = predictor weights calculated by summing the Akaike weights for all models in the a priori set in which the variable occurred. The larger the predictor weight, the greater the importance of that predictor.

b = number of models in which the variable occurred.

\* = denote 2-way interaction terms.

<https://doi.org/10.1371/journal.pone.0175385.t004>

relatedness of the pair were not significant ( $P > 0.05$ ) predictors of association strength and their relative importances were very small (Table 4).

Here, we report multiple comparisons of LSmeans using the Bonferroni correction [64]; the association indices as predicted by the best model are back-transformed. See Tables H, I and J in S4 Appendix for predicted values with 95% CI, and  $P$ -values, test statistics and degrees of freedom of multiple comparisons.

The interaction between season and year had a significant effect on association strength ( $P < 0.0001$ ) (Fig 2; Table I in S4 Appendix). Association indices between adult mule deer during the pre-rut were significantly different from one year to another (all  $P < 0.0001$ ). Associations were stronger in 2010 than in 2009 in every season (all  $P < 0.02$ ), and were also stronger in 2010 than in 2011 from fawning to early gestation (all  $P < 0.045$ ). During 2009, association indices were significantly stronger during fawning (all  $P < 0.01$ ) and pre-rut (all  $P < 0.045$ ) than in the other three seasons. In 2010, associations were stronger in pre-rut than in any other season (all  $P < 0.0001$ ) except for early gestation ( $P = 0.69$ ), weaker in late gestation than in fawning ( $P = 0.045$ ), and stronger in early gestation than in late gestation ( $P < 0.0001$ ) and rut ( $P = 0.02$ ). In 2011 associations were strongest in pre-rut (all  $P < 0.01$ ), and stronger in fawning than in late gestation ( $P = 0.002$ ), rut ( $P < 0.0001$ ) or early gestation ( $P = 0.002$ ).

The interaction between season and sex was also a significant predictor of association strength ( $P < 0.0001$ ) (Fig 3; Table J in S4 Appendix). Pre-rut and rut were the only seasons in which association strength differed significantly among sex classes. In pre-rut, different-sex associations were weaker than same-sex associations (all  $P < 0.002$ ), while during the rut MM associations were significantly (all  $P < 0.045$ ) weaker than FF and FM associations. For each pair class, the strength of the association also varied across seasons: MM associations were weakest in rut (all  $P < 0.03$ ) and strongest in pre-rut (all  $P < 0.01$ ), FF associations were

**Table 5. Model selection results for strength of spatial association mixed-effects model analyses.** Models are ranked according to Akaike information criterion (AICc) and presented along with the delta ( $\Delta_p$ , the change in AICc relative to the best model), and Akaike weights. Model 15 had a 99.99% chance of being the best model.

| Model ID | DF | logLik | AICc   | Delta  | Akaike weight         |
|----------|----|--------|--------|--------|-----------------------|
| 15       | 34 | 434.2  | -799.7 | 0.0    | 0.9999                |
| 14       | 32 | 423.0  | -781.3 | 18.4   | $1.0 \times 10^{-4}$  |
| 12       | 38 | 427.7  | -778.3 | 21.4   | $2.3 \times 10^{-5}$  |
| 13       | 29 | 390.1  | -721.6 | 78.0   | $1.1 \times 10^{-17}$ |
| 6        | 24 | 382.8  | -717.2 | 82.4   | $1.3 \times 10^{-18}$ |
| 9        | 22 | 380.4  | -716.5 | 83.2   | $8.8 \times 10^{-19}$ |
| 7        | 27 | 381.7  | -708.9 | 90.7   | $2.0 \times 10^{-20}$ |
| 11       | 66 | 420.5  | -706.1 | 93.6   | $4.7 \times 10^{-21}$ |
| 3        | 64 | 418.4  | -706.1 | 93.6   | $4.7 \times 10^{-21}$ |
| 8        | 67 | 418.8  | -700.5 | 99.1   | $3.0 \times 10^{-22}$ |
| 1        | 69 | 420.7  | -700.2 | 99.4   | $2.6 \times 10^{-22}$ |
| 2        | 19 | -523.0 | 1084.2 | 1883.9 | 0                     |
| 4        | 21 | -522.1 | 1086.6 | 1886.2 | 0                     |
| 10       | 57 | -502.3 | 1120.9 | 1920.6 | 0                     |
| 5        | 44 | -526.8 | 1143.0 | 1942.7 | 0                     |

<https://doi.org/10.1371/journal.pone.0175385.t005>

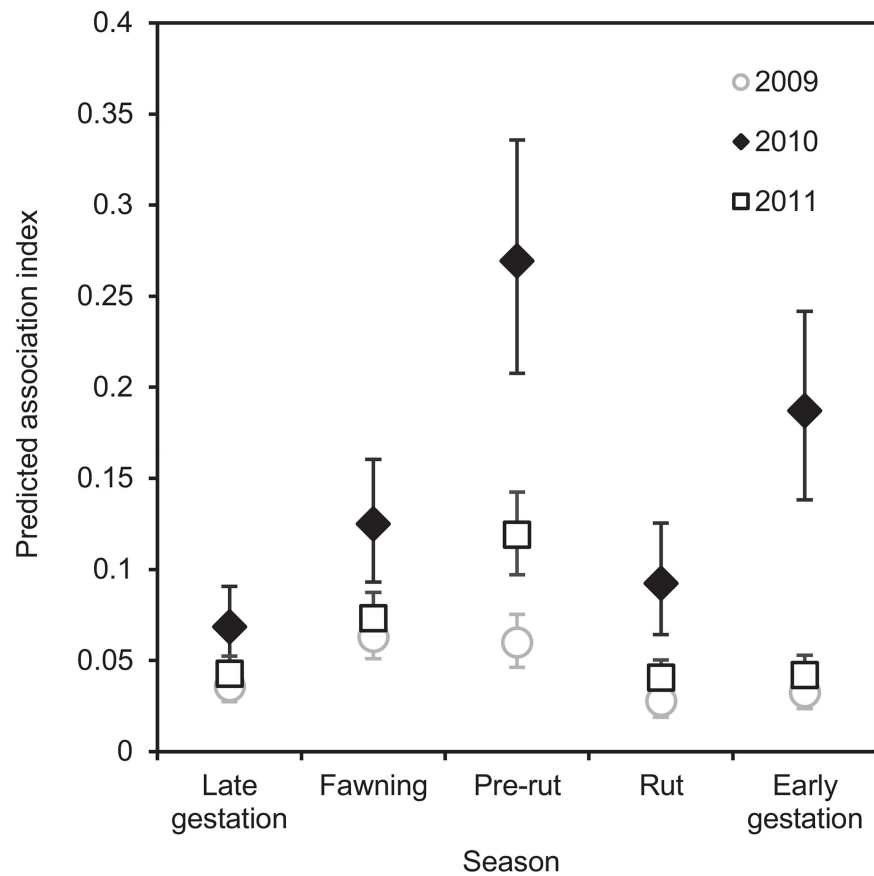

**Fig 2. Seasonal predicted pairwise spatial association indices by year among adult mule deer.** Error bars are 95% CI. For observed values, see S1 Fig; for values used to generate this graph, see Table H in S4 Appendix.

<https://doi.org/10.1371/journal.pone.0175385.g002>

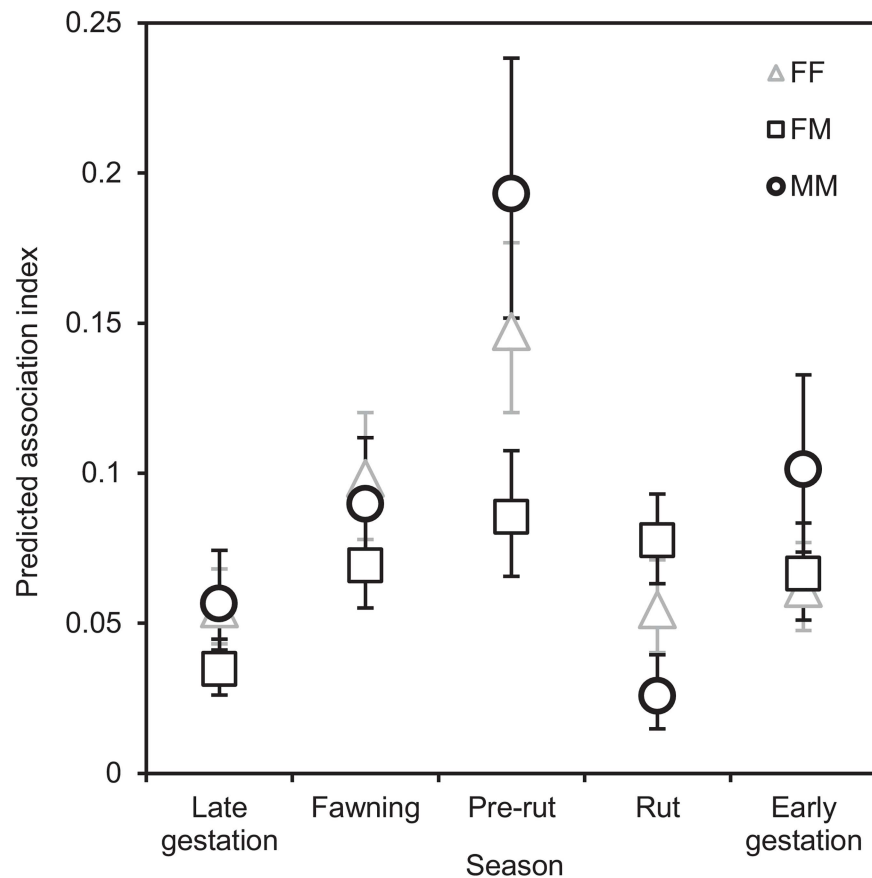

**Fig 3. Seasonal predicted pairwise spatial association indices by sex class among adult mule deer.** FF are pairs of females, MM are pairs of males, and FM are female-male pairs. Error bars are 95% CI. See S2 Fig for observed values; for values used to generate this graph, see Table H in S4 Appendix.

<https://doi.org/10.1371/journal.pone.0175385.g003>

strongest in pre-rut (all  $P < 0.045$ ), and FM associations were weakest in late gestation (all  $P < 0.01$ ).

Sex classes and VI also interacted significantly in their effects on association strength ( $P < 0.0001$ ) (Fig 4); as did season and VI ( $P < 0.0001$ ) (Fig 5). For all sexes (Fig 4) and all seasons (Fig 5), an increase in VI resulted in an increase in association strength. Notably, at increasing levels of VI, associations were stronger for FF pairs than for MM and FM pairs (Fig 4), and in pre-rut and fawning than in the rest of the seasons (Fig 5).

### Aim 2: Temporal patterns of associations

The class LARs among 44 adult mule deer in 2011 were best described by either one of two models: (A) a model containing rapid disassociations, constant companionships and casual acquaintances, or (B) a model containing rapid disassociations and two levels of casual acquaintances, one lasting longer than the other (Fig 6; Table C in S2 Appendix). The LARs, which decreased over time, always remained above the null association rate across all sex, age and CWD status classes (Figures A, B, C, D, E, F, G, H and I in S2 Appendix). Analyses between MM and YY associations produced cyclic-like patterns in the LARs (Figures G and H in S2 Appendix), and also values of SE and duration ranges that were implausible (e.g. 96 days on average ranging from 1 to 1) (Table G in S2 Appendix) despite several tests with different Jackknife levels.

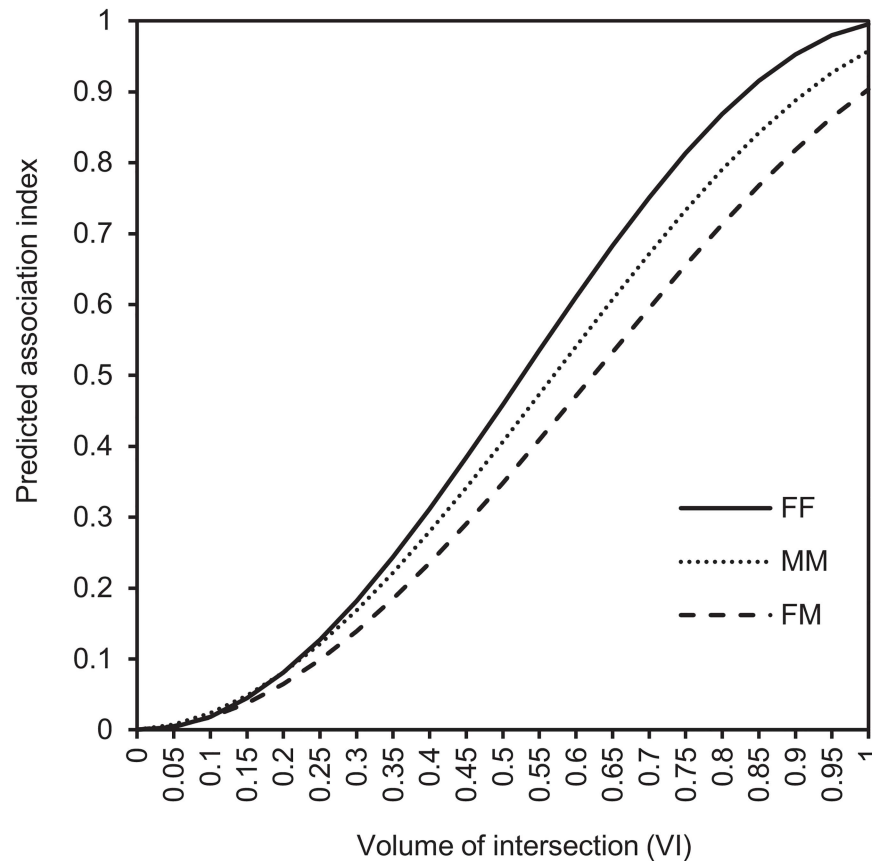

**Fig 4. Predicted pairwise spatial association indices by sex class at different levels of volume of intersection (VI) among adult mule deer.** FF are pairs of females, MM are pairs of males, and FM are female-male pairs. No confidence intervals (CI) are shown to facilitate graph readability. For CI and observed values, see [S3 Fig](#).

<https://doi.org/10.1371/journal.pone.0175385.g004>

With respect to sex differences in the temporal stability of class associations, the great majority (94.3%) of associations between females disassociated over two different time scales (i.e. two levels of casual acquaintances), with most (71.1%) disassociating after a longer period of association (about 980 days) and 23.2% after 1 to 3 days. Only 5.7% of FF associations lasted no more than 1 day (i.e. rapid disassociations) (Fig 6; Table G in [S2 Appendix](#)). In contrast, most (72.9%) of the FM associations lasted no more than 1 day, while the rest either decreased over time (i.e. casual acquaintances) (14.1%), lasting about 17 days, or were stable over the year (i.e. constant companionships) (13%) (Fig 6; Table E in [S2 Appendix](#)).

With respect to age differences in the temporal stability of class associations, many (51.1%) associations between older deer (OO) lasted no more than 1 day, while the rest were either stable over the year (29.4%), or decreased over time (19.6%), lasting about 39 days before disassociation occurred (Fig 6; Table E in [S2 Appendix](#)). Older and younger deer mainly (46.3%) associated at a constant rate over the year, and less commonly (14.2%) associated as casual acquaintances that were together for about 47 days before disassociating (Fig 6; Table E in [S2 Appendix](#)).

Temporal stability also differed with CWD status. Pairs of CWD-negative deer (NN), and of CWD-positive and negative deer (PN), associated similarly (Fig 6). Both cases had similar proportions of their elements and were better described by the model including constant

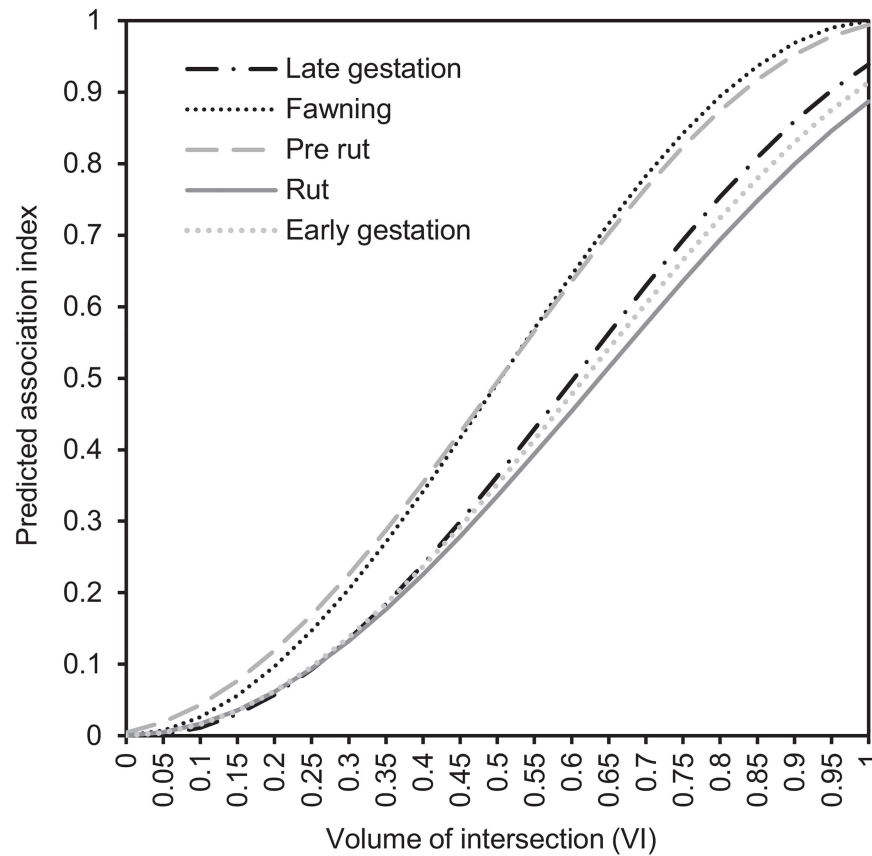

**Fig 5. Seasonal predicted pairwise spatial association indices at different levels of volume of intersection (VI) among adult mule deer.** No confidence intervals (CI) are shown to facilitate graph readability. For CI and observed values, see S4 Fig.

<https://doi.org/10.1371/journal.pone.0175385.g005>

companionships (model A) (Table E in S2 Appendix). In contrast, associations between positive deer (PP) were better described by the model without constant companionships (model B) (Table G in S2 Appendix). Moreover, 79.2% of PP pairs disassociated at two different time scales: 29.3% after about 2 days of association, and 49.9% after about 3 years (Fig 6; Table G in S2 Appendix).

## Discussion

Social behaviours that influence contact rates and the sharing of space in animal species are potentially important factors in information and disease spread within populations [1, 67]. For example, data on association patterns have proven useful in understanding the ecology of diseases that can be transmitted through both direct and environmental contacts, such as tuberculosis in wild animals [3, 68, 69], and CWD in female white-tailed deer [4]. We found that pairwise spatial association patterns of adult mule deer were independent of genetic relatedness, age and CWD status, but seasonal association strength varied with year, sex and home range overlap. We also found important sex and CWD status differences in the temporal stability of spatial associations. By identifying the factors related to individuals' choices of association partners, we provide empirical data to increase understanding of the possible role of social behaviour in the long-term dynamics of disease transmission among mule deer.

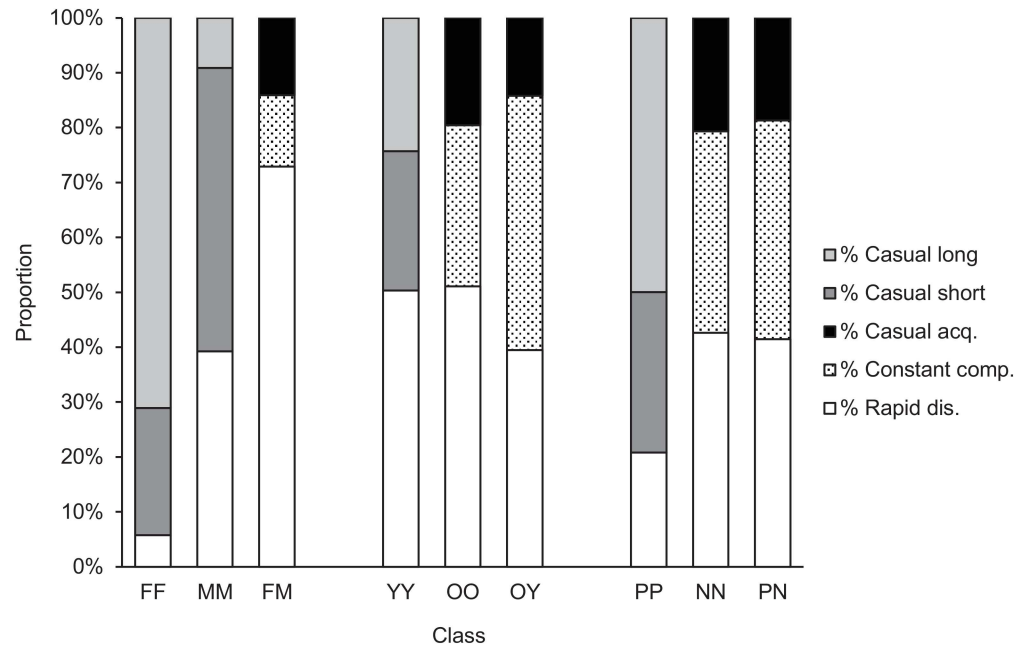

**Fig 6. Proportions of components in lagged association rate models among 44 adult mule deer in Saskatchewan, Canada.** FF = female-female pairs, MM = male-male pairs, FM = female-male pairs; YY = young-young pairs, OO = old-old pairs, OY = old-young pairs; PP = positive-positive pairs, NN = negative-negative pairs, and PN = positive-negative pairs. Rapid disassociations were associations that lasted the sampling period (i.e. 1 day) at most. In constant companionships, the probability of re-association did not decay or increase over time within the context of the study period (i.e. 1 year). In casual acquaintances, the probability of re-association decayed over time, and their rate of decay was approximated from a1. In some cases, LARs of casual acquaintances decreased over 2 different time scales, one lasting longer (casual long) than the other (casual short). For formulae, and results on durations and SE, see [S2 Appendix](#).

<https://doi.org/10.1371/journal.pone.0175385.g006>

In this study, the strength of associations among mule deer varied among years, with stronger associations in 2010, and a marked peak during the winter (early gestation) of that year. The 2010 pattern may be linked to weather, as the frequency of very cold days (-34 to -10°C) was greater and the mean temperature colder in the winter of 2010 than in 2009 or 2011 (-11 vs -8 and -5°C, respectively) [70]. There was also almost twice as much snow on the ground on a daily basis during rut and early gestation in 2010 than in 2009 (means = 16 vs 9 cm) [70]. In severe winters with decreased temperatures and increased snow depth, escape from predators is hindered [71], forage availability declines and the energetic costs of foraging increase [72]. This forces deer onto the southerly aspects of hills where solar radiation reduces snow cover, resulting in larger winter aggregations.

We also observed seasonal patterns that varied in relation to sex of the associating pair. During pre-rut, associations between males were the strongest and different-sex associations the weakest. Later, in rut, male-male association strength markedly decreased and became weaker than female-female and female-male associations. These are distinctive patterns that are likely driven by mule deer courting and mating behaviour [31]. Prior to females entering oestrus, males establish their dominance using threats and intimidation displays that occur in very close proximity, when contenders circle each other, snort and lick their noses [73], sometimes followed by sparring matches [74]. These behaviours result in more male-male proximity events, and consequently in a peak in male-male spatial association indices in pre-rut. Then, in rut, the frequency and variety of male vocalizations related to courting increase [75],

probably to alert other males from a distance and discourage close-contact confrontations [31]. Moreover, male mule deer wander more widely throughout their home ranges during rut to closely follow females to test if they are in oestrus, moving from one female group to the next [76]. Once in oestrus, females allow males to lick their genitals and copulate [76]. These behaviours increase spatial associations between adult females and males, and decrease those between males. In terms of disease, the risk of direct animal to animal transmission between adult males is likely increased in pre-rut, whereas that between adult males and females is probably increased during rut. However, these suggestions require further research, as sharing space does not necessarily translate into a greater frequency of physical contacts among deer (e.g. [77, 78]), and increased spatial association may more accurately translate into increased risk of transmission through sharing contaminated environments.

Genetic relatedness was not an important predictor of spatial associations among adult mule deer in our study area, suggesting that at a very short distance (within 25 m), there is no genetic structuring among these adult mule deer. Similarly, the frequency and duration of proximity instances (within 1.4 m) were not related to genetic relatedness in elk [20]. At a larger spatial scale (km), a study of mule deer [79] also found low levels of genetic structure and limited genetic isolation. However, there were very few highly related adult individuals in our data set (6/982 pairs  $r > 0.4$ ), therefore, we are unable to determine whether there would be an increased number of associations among close relatives. In contrast, spatially proximate individuals were more genetically related in studies of mule deer [47], white-tailed deer [80–83], Sitka black-tailed deer (*O. hemionus sitkensis*) [84], and non-*Odocoileus* cervid species [85–87]. However, the strength of the correlation between kinship and spatial separation or home range overlap varies depending on the set of deer considered in the analysis, and the scale used for measuring spatial distance [88]. It is not surprising that studies that limit analyses to pairs of deer in close proximity (e.g. captured within 1.5 km from each other, with known home range overlap), and that exclude dispersing males and include individuals with high genetic relatedness (e.g. does and fawns), often show a strong association between genetic and spatial distances (e.g. [82]). Although the spatial genetic structure of mule deer is driven by female philopatry and dispersal of males at large spatial scales [47], our data suggest that even at small scales, adults tend to mix freely, suggesting that disease in adults would spread beyond family groups as it should be transmitted similarly among related and unrelated individuals [20, 88].

The greater the VI between pairs of mule deer, the stronger the association they exhibited, irrespective of season and sex class. These findings were expected given that two individuals must be in the same area in order to associate. However, we found cases of apparent preferences (very large association index despite very small VI) and avoidances (very small association index despite large VI), suggesting that mule deer do not associate at random, and that their spatial associations are only partially explained by the extent of their home range overlap, as previously reported in species with fluid fission-fusion dynamics such as eastern grey kangaroos (*Macropus giganteus*) [89], giraffes (*Giraffa camelopardalis*) [14] and eastern water dragons (*Intellagama lesueurii*) [90]. In our study, at the same level of VI, associations were strongest in pre-rut and fawning, emphasizing the changes in socio-spatial organisation during the mating season. Also, at the same level of VI, associations were strongest between adult females, suggesting that females are more interested in being together than are males.

Between- and within-class lagged association rate analyses indicated that classes of adult mule deer mostly disassociated, either rapidly within one day, or over longer time periods. Furthermore, it also showed that in a small proportion of associations between certain classes, the probability of re-association did not increase or decrease over time, i.e. was constant. LARs always remained above the null association rate. This suggests that if deer re-associate, they are

more likely to do so with individuals of the same class as their previous associates than with individuals from the population at random [21].

There were marked sex differences in the temporal patterns of associations. Females mostly (71.1%) related to other females in long-term associations with a declining probability of re-association over time. In contrast, when females were found with males, they were mostly (72.9%) not found with males again on the next day. The long-term probability of females re-associating with other females may be explained by a greater preference for one another. The rapid splitting of female-male associations may be due to males' brief assessments of females' reproductive status, or to unintended encounters at specific focal points in the study area such as waterholes and grain spills. MM and YY were the only two models in which the LARs appeared cyclic (i.e. decreased and then increased). A non-exponential model, such as one with a trigonometric function of the lag (e.g.  $\cos(t)$ ), may work best for these two cases (pg. 206 in [21]); further testing is required.

In addition to finding that age was not a significant predictor of pairwise association strengths, we observed negligible age differences in LARs among age classes. We defined an association based on proximity obtained from GPS locations, and our study only focused on adult deer as GPS collars were too heavy to be deployed in younger (< 21 months old) individuals. If we could instead define an association based on group membership from direct observations, we might find interesting age differences in association strength and in LARs, as all age classes could be included in such analyses.

We previously reported that deer showing clinical signs of CWD were less likely to be found in groups than their healthy counterparts [25]. However, in the current study we have shown that CWD infection was not an important predictor of pairwise spatial association strengths among adult mule deer once season, year, VI, and sex of the associating pair were accounted for. As we had sufficient data on infected individuals (700/982 pairs included at least one infected deer), this finding suggests that clinical signs affect the probability of grouping, but not the proportion of time spent in association, as this was defined in our study. Fine-scale studies based on observations of direct animal to animal contacts may reveal effects of disease status on interaction rates. Interestingly though, in the LARs analysis, we found that when one or both members were CWD-negative, a proportion (~37 to 40%) of the associations had a constant probability of re-association, whereas when both members were CWD-positive, this element was not present, but rather all associations had a declining probability of re-association. The causes and consequences of these findings are unclear; however, they support that infected and non-infected deer relate to others in a different way.

In conclusion, we have increased understanding of the factors affecting the pairwise spatial association strengths of adult mule deer, and how individual characteristics such as sex, age and disease status alter the temporal stability of spatial associations among classes of individuals. This adds to both studies of behavioural ecology and of disease dynamics. Current epidemiological models of CWD are lacking empirical data on the structure of mule deer society. The association matrices generated in this study can be used in network models or individual-based spatial models that require the inclusion of more realistic (i.e. heterogeneous) data on association indices to better guide and inform disease management strategies.

## Supporting information

**S1 Fig. Box plots of observed association indices by season and year among adult mule deer in Saskatchewan, Canada.** LG = late gestation, F = fawning, PR = pre-rut, R = rut, and EG = early gestation. Most seasons (all except PR 2010, EG 2010 and EG 2011) had a median of 0. The maximum and minimum values in every season were 1 and 0, respectively.



Interquartile 3 (in dark grey) depicts values from the median to the 75th percentile. Interquartile 2 (in light grey) depicts values from the median to the 25th percentile. Mean association index is depicted with a white rhombus.

(TIF)

**S2 Fig. Box plots of observed association indices among pairs of adult mule deer in Saskatchewan, Canada.** FF = pairs of females. FM = female-male pairs. MM = pairs of males. LG = late gestation, F = fawning, PR = pre-rut, R = rut, and EG = early gestation. Most season and sex combinations (all except FM in rut, and MM in late gestation, pre-rut and early gestation) had a median of 0. The maximum and minimum values in every season and sex combinations were 1 and 0, respectively. Interquartile 3 (in dark grey) depicts values from the median to the 75th percentile. Interquartile 2 (in light grey) depicts values from the median to the 25th percentile. Mean association index is depicted with a white rhombus.

(TIF)

**S3 Fig. Predicted (black) and observed (grey) pairwise association indices by sex class at increasing levels of volume of intersection (VI) among adult mule deer in Saskatchewan, Canada.** FF = pairs of females, FM are female-males pairs, and MM are pairs of males. 95% confidence intervals depicted in dotted lines.

(TIF)

**S4 Fig. Seasonal variation of predicted (black) and observed (grey) pairwise association indices at increasing levels of volume of intersection (VI) among adult mule deer in Saskatchewan, Canada.** 95% confidence intervals depicted in dotted lines.

(TIF)

**S1 Appendix. Datasets used to investigate factors affecting association strength (aim 1), and temporal patterns of associations (aim 2).**

(XLSX)

**S2 Appendix. Details on temporal patterns of spatial associations among mule deer in a chronic wasting disease endemic area in Saskatchewan, Canada.** Tables A, B, C, D, E, F, and G; and Figures A, B, C, D, E, F, G, H, and I.

(DOCX)

**S3 Appendix. Analysis of variance table of top model (model 15) for strength of pairwise spatial association among adult mule deer in Saskatchewan, Canada, and variance and standard deviation of random effect (i.e. dyad).**

(XLSX)

**S4 Appendix. Model output with predicted association indices and pairwise comparisons.**

Tables H, I and J.

(XLSX)

## Acknowledgments

Thanks are due to the many field crew members for assistance in the collection of data; to Christine Wilson, Erin Moffatt, Crystal Rainbow, and Marnie Zimmer for assistance in telemetry data management; to David Coltman for expediting the genetic analysis; to Gary Wobeser for invaluable critiques of earlier versions of this manuscript; to Hal Whitehead, David Lusseau, and Weicheng Qian for help with interpretation and troubleshooting of lagged association rates; and to Cabri landowners for their collaboration. We also thank two anonymous reviewers whose comments improved this manuscript.

## Author Contributions

**Conceptualization:** MFMS TKB CLW AWG.

**Data curation:** MFMS RGD.

**Formal analysis:** MFMS CSM SPB RGD CIC.

**Funding acquisition:** TKB MFMS.

**Investigation:** MFMS.

**Methodology:** MFMS AWG CSM RGD SPB CLW TKB.

**Project administration:** TKB.

**Resources:** CIC.

**Supervision:** TKB AWG CLW.

**Visualization:** MFMS.

**Writing – original draft:** MFMS.

**Writing – review & editing:** MFMS AWG CSM RGD SPB CLW TKB CIC.

## References

1. Cross PC, Drewe J, Patrek V, Pearce G, Samuel MD, Delahay RJ. Wildlife population structure and parasite transmission: implications for disease management. In: R.J. D, Smith GC, Hutchings MR, editors. *Management of disease in wild mammals*. Japan: Springer; 2010. p. 9–30.
2. Nunn CL, Craft ME, Gillespie TR, Schaller M, Kappeler PM. The sociality–health–fitness nexus: synthesis, conclusions and future directions. *Philos Trans R Soc Lond B Biol Sci*. 2015; 370(1669): 20140111.
3. Cross PC, Lloyd-Smith JO, Bowers JA, Hay CT, Hofmeyr M, Getz WM. Integrating association data and disease dynamics in a social ungulate: bovine tuberculosis in African buffalo in the Kruger National Park. *Ann Zool Fenn*. 2004; 41(6): 879–892.
4. Schauber EM, Nielsen CK, Kjær LJ, Anderson CW, Storm DJ. Social affiliation and contact patterns among white-tailed deer in disparate landscapes: implications for disease transmission. *J Mammal*. 2015; 96(1): 16–28. <https://doi.org/10.1093/jmammal/gyu027> PMID: 26937044
5. Potapov A, Merrill E, Pybus M, Coltman D, Lewis MA. Chronic wasting disease: Possible transmission mechanisms in deer. *Ecol Model*. 2013; 250: 244–257.
6. Dulberger J, Hobbs NT, Swanson HM, Bishop CJ, Miller MW. Estimating chronic wasting disease effects on mule deer recruitment and population growth. *J Wildlife Dis*. 2010; 46(4): 1086–1095.
7. Almborg ES, Cross PC, Johnson CJ, Heisey DM, Richards BJ. Modeling routes of chronic wasting disease transmission: environmental prion persistence promotes deer population decline and extinction. *PLoS ONE*. 2011; 6(5): e19896. <https://doi.org/10.1371/journal.pone.0019896> PMID: 21603638
8. Miller MW, Hobbs NT, Tavener SJ. Dynamics of prion disease transmission in mule deer. *Ecol Appl*. 2006; 16(6): 2208–2214. PMID: 17205898
9. Miller MW, Williams ES, Hobbs NT, Wolfe LL. Environmental sources of prion transmission in mule deer. *Emerg Infect Dis*. 2004; 10(6): 1003–1006. <https://doi.org/10.3201/eid1006.040010> PMID: 15207049
10. Williams ES, Miller MW, Kreeger TJ, Kahn RH, Thorne ET. Chronic wasting disease of deer and elk: A review with recommendations for management. *J Wildlife Manage*. 2002; 66(3): 551–563.
11. Oraby T, Vasilyeva O, Krewski D, Lutscher F. Modeling seasonal behavior changes and disease transmission with application to chronic wasting disease. *J Theor Biol*. 2014; 340: 50–59. <https://doi.org/10.1016/j.jtbi.2013.09.003> PMID: 24035840
12. Schauber EM, Storm DJ, Nielsen CK. Effects of joint space use and group membership on contact rates among white-tailed deer. *J Wildlife Manage*. 2007; 71(1): 155–163.
13. Porter WF, Mathews NE, Underwood HB, Sage RWJ, Behrend DF. Social organization in deer: Implications for localized management. *Environ Manage*. 1991; 15(6): 809–814.

14. Carter KD, Seddon JM, Frère CH, Carter JK, Goldizen AW. Fission–fusion dynamics in wild giraffes may be driven by kinship, spatial overlap and individual social preferences. *Anim Behav.* 2013; 85(2): 385–394.
15. Smith JE. Hamilton's legacy: Kinship, cooperation and social tolerance in mammalian groups. *Anim Behav.* 2014; 92: 291–304.
16. Podgórski T, Lusseau D, Scandura M, Sönnichsen L, Jędrzejewska B. Long-lasting, kin-directed female interactions in a spatially structured wild boar social network. *PLoS ONE.* 2014; 9(6): e99875. <https://doi.org/10.1371/journal.pone.0099875> PMID: 24919178
17. Iacolina L, Scandura M, Bongio P, Apollonio M. Nonkin associations in wild boar social units. *J Mammal.* 2009; 90(3): 666–674.
18. Vander Wal E, Gagné-Delorme A, Festa-Bianchet M, Pelletier F. Dyadic associations and individual sociality in bighorn ewes. *Behav Ecol.* 2016; 27(2): 560–566.
19. Albon SD, Staines HJ, Guinness FE, Clutton-Brock TH. Density-dependent changes in the spacing behaviour of female kin in red deer. *J Anim Ecol.* 1992; 61(1): 131–137.
20. Vander Wal E, Paquet PC, Andres JA. Influence of landscape and social interactions on transmission of disease in a social cervid. *Mol Ecol.* 2012; 21(5): 1271–1282. <https://doi.org/10.1111/j.1365-294X.2011.05431.x> PMID: 22289112
21. Whitehead H. Analyzing animal societies. Quantitative methods for vertebrate social analysis. United States of America: The University of Chicago Press; 2008.
22. Bouwman KM, Hawley DM. Sickness behaviour acting as an evolutionary trap? Male house finches preferentially feed near diseased conspecifics. *Biol Lett.* 2010; 6(4): 462–465. <https://doi.org/10.1098/rsbl.2010.0020> PMID: 20164082
23. Loehle C. Social barriers to pathogen transmission in wild animal populations. *Ecology.* 1995; 76(2): 326–335.
24. Hart BL. Biological basis of the behavior of sick animals. *Neurosci Biobehav R.* 1988; 12(2): 123–137.
25. Mejía Salazar MF, Waldner C, Stookey J, Bollinger TK. Infectious disease and grouping patterns in mule deer. *PLoS ONE.* 2016; 11(3): e0150830. <https://doi.org/10.1371/journal.pone.0150830> PMID: 27007808
26. Williams ES, Young S. Neuropathology of chronic wasting disease of mule deer (*Odocoileus hemionus*) and elk (*Cervus elaphus nelsoni*). *Vet Pathol.* 1993; 30(1): 36–45. <https://doi.org/10.1177/030098589303000105> PMID: 8442326
27. Williams ES, Miller MW. Chronic wasting disease in deer and elk in North America. *Rev Sci Tech OIE.* 2002; 21(2): 305–316.
28. Silbernagel ER, Skelton NK, Waldner CL, Bollinger TK. Interaction among deer in a chronic wasting disease endemic zone. *J Wildlife Manage.* 2011; 75(6): 1453–1461.
29. Bowyer RT, McCullough DR, Belovsky GE. Causes and consequences of sociality in mule deer. *Alces.* 2001; 37(2): 371–402.
30. Lingle S. Group composition and cohesion in sympatric white-tailed and mule deer. *Can J Zool.* 2003; 81(7): 1119–1130.
31. Ad Vos, Brox P, Geist V. A review of social behavior of the North American cervids during the reproductive period. *Am Midl Nat.* 1967; 77(2): 390–417.
32. Government of Canada. Canadian Climate Normals 1981–2010—Station Data—Swift Current, Saskatchewan. Canada: 2014 1981–2010. Report No.
33. Skelton NK. Migration, dispersal, and survival patterns of mule deer (*Odocoileus hemionus*) in a chronic wasting disease-endemic area of southern Saskatchewan. MSc, University of Saskatchewan. 2010. Available: <http://ecommons.usask.ca/handle/10388/etd-09172010-082126>
34. Canadian Wildlife Health Cooperative. Chronic wasting disease testing in Saskatchewan, 1997–2014. 2017. Available: [http://www.cwhc-rcsf.ca/data\\_products\\_cwd.php](http://www.cwhc-rcsf.ca/data_products_cwd.php). Accessed 2013.
35. ESRI. ArcGIS Desktop: Release 10.3. 2016. Redlands: Environmental Systems Research Institute.
36. Statistics Canada. Road network files: 2016 (8 February 2017).
37. Webb SL, Lewis JS, Hewitt DG, Hellickson MW, Bryant FC. Assessing the helicopter and net gun as a capture technique for white-tailed deer. *J Wildlife Manage.* 2008; 72(1): 310–314.
38. Clover MR. Single-gate deer trap. *Calif Fish Game.* 1954; 42: 199–201.
39. Jensen W. How old is my deer? *North Dakota Outdoors.* 1996:2–6.
40. Dasmann RF, Taber RD. Determining structure in Columbian black-tailed deer populations. *J Wildlife Manage.* 1956; 20(1): 78–83.

41. Wild MA, Spraker TR, Sigurdson CJ, O'Rourke KI, Miller MW. Preclinical diagnosis of chronic wasting disease in captive mule deer (*Odocoileus hemionus*) and white-tailed deer (*Odocoileus virginianus*) using tonsillar biopsy. *J Gen Virol.* 2002; 83(10): 2629–2634.
42. Schreuder BEC, Van Keulen LJM, Vromans MEW, Langeveld JPM, Smits MA. Tonsillar biopsy and PrPSc detection in the preclinical diagnosis of scrapie. *Vet Rec.* 1998; 142(21): 564–568. PMID: [9634704](#)
43. Geremia C, Hoeting JA, Wolfe LL, Galloway NL, Antolin MF, Spraker TR, et al. Age and repeated biopsy influence antemortem PRP(CWD) testing in mule deer (*Odocoileus hemionus*) in Colorado, USA. *J Wildlife Dis.* 2015; 51(4): 801–810.
44. Thomsen BV, Schneider DA, O'Rourke KI, Gidlewski T, McLane J, Allen RW, et al. Diagnostic accuracy of rectal mucosa biopsy testing for chronic wasting disease within white-tailed deer (*Odocoileus virginianus*) herds in North America: Effects of age, sex, polymorphism at PRNP codon 96, and disease progression. *J Vet Diagn Invest.* 2012; 24(5): 878–887. <https://doi.org/10.1177/1040638712453582> PMID: [22914819](#)
45. Anderson AE, Wallmo OC. *Odocoileus hemionus*. *Mamm Species.* 1984; 219: 1–9.
46. Mathiason CK, Hays SA, Powersm J, Hayes-Klug J, Langenberg J, Dahmes SJ, et al. Infectious prions in pre-clinical deer and transmission of chronic wasting disease solely by environmental exposure. *PLoS ONE.* 2009; 4(6): e5916. <https://doi.org/10.1371/journal.pone.0005916> PMID: [19529769](#)
47. Cullingham CI, Nakada SM, Merrill EH, Bollinger TK, Pybus MJ, Coltman DW. Multiscale population genetic analysis of mule deer (*Odocoileus hemionus hemionus*) in western Canada sheds new light on the spread of chronic wasting disease. *Can J Zool.* 2011; 89(2): 134–147.
48. Hardy OJ, Vekemans X. SPAGeDi: a versatile computer program to analyse spatial genetic structure at the individual or population levels. *Mol Ecol Notes.* 2002; 2(4): 618–620.
49. Queller DC, Goodnight KF. Estimating relatedness using genetic markers. *Evolution.* 1989; 43(2): 258–275.
50. Calenge C. Home range estimation in R: the adehabitatHR package. Saint Benoist, France: CRAN; 2015. p. 61.
51. Calenge C. The package “adehabitat” for the R software: A tool for the analysis of space and habitat use by animals. *Ecol Model.* 2006; 197(3–4): 516–519.
52. Whitehead H. SOCPROG programs: analyzing animal social structures—SOCPROG2.5 (release 2014a). Halifax, Nova Scotia, Canada 2014. p. 83.
53. Whitehead H. SOCPROG programs: analyzing animal social structures. *Ecol Sociobiol.* 2009; 63: 765–778.
54. Mann J, Stanton MA, Patterson EM, Bienenstock EJ, Singh LO. Social networks reveal cultural behaviour in tool-using dolphins. *Nat Commun.* 2012; 3: 980. <https://doi.org/10.1038/ncomms1983> PMID: [22864573](#)
55. Bullard F. Estimating the home range of an animal: a Brownian bridge approach. MSc, University of North Carolina at Chapel Hill. 1991. Available: <http://lists.faulnia.it/pipermail/animov/attachments/20041103/650a42e9/Bullard1991.pdf>
56. Horne JS, Garton EO, Krone SM, Lewis JS. Analyzing animal movements using brownian bridges. *Ecology.* 2007; 88(9): 2354–2363. PMID: [17918412](#)
57. Calenge C, Basille M, Dray S, Fortmann-Roe S. Analysis of habitat selection by animals. Package 'adehabitat': CRAN; 2015. p. 224.
58. Ager AA, Johnson BK, Kern JW, Kie JG. Daily and seasonal movements and habitat use by female Rocky Mountain elk and mule deer. *J Mammal.* 2003; 84(3): 1076–1088.
59. Seidel KD. Statistical properties and applications of a new measure of joint space use for wildlife. Unpublished Master's thesis, University of Washington. 1992.
60. Bates D, Mächler M, Bolker B, Walker S. Fitting linear mixed-effects models using lme4. *J Stat Softw.* 2015; 67(1): 48.
61. Barton K. Package 'MuMIn'. Multi-Model Inference: CRAN; 2015. p. 63.
62. R Core Team. R: A language and environment for statistical computing: 3.2.0. 2016. Vienna, Austria: R Foundation for Statistical Computing.
63. Burnham KP, Anderson DR. Formal inference from more than one model: Multimodel inference (MMI). In: Burnham KP, Anderson DR, editors. *Model selection and multi-model inference: a practical information-theoretic approach.* 2nd ed. USA: Springer; 2003. p. 149–205.
64. Bonferroni CE. *Teoria statistica delle classi e calcolo delle probabilita.* Pubblicazioni del R Istituto Superiore di Scienze Economiche e Commerciali di Firenze, 1936.
65. Whitehead H. Investigating structure and temporal scale in social organizations using identified individuals. *Behav Ecol.* 1995; 6(2): 199–208.

66. Whitehead H. Selection of models of lagged identification rates and lagged association rates using AIC and QAIC. *Commun Stat Simul Comput.* 2007; 36(6): 1233–1246.
67. Altizer S, Nunn CL, Thrall PH, Gittleman JL, Antonovics J, Cunningham AA, et al. Social organization and parasite risk in mammals: Integrating theory and empirical studies. *Annu Rev Ecol Evol Syst.* 2003; 34: 517–547.
68. Corner LAL, Pfeiffer DU, Morris RS. Social-network analysis of *Mycobacterium bovis* transmission among captive brushtail possums (*Trichosurus vulpecula*). *Prev Vet Med.* 2003; 59(3): 147–167. PMID: [12809760](#)
69. Drewe JA. Who infects whom? Social networks and tuberculosis transmission in wild meerkats. *Proc R Soc Lond B.* 2010; 277(1681): 633–642.
70. Weather Spark. Daily weather data for Swift Current Airport, Saskatchewan, Canada: Cedar Lake Ventures, Inc; 2016 (8 March 2016). Available from: [www.weatherspark.com](http://www.weatherspark.com)
71. Hawkins RE, Klimstra WD. A preliminary study of the social organization of white-tailed deer. *J Wildlife Manage.* 1970; 34: 407–419.
72. Parker KL, Robbins CT, Hanley TA. Energy expenditures for locomotion by mule deer and elk. *J Wildlife Manage.* 1984; 48(2): 474–488.
73. Cowan IM, Geist V. Aggressive behavior in deer of the genus *Odocoileus*. *J Mammal.* 1961; 42(4): 522–526.
74. Wachtel MA, Bekoff M, Fuenzalida CE. Sparring by mule deer during rutting: class participation, seasonal changes, and the nature of asymmetric contests. *Biol Behav.* 1978; 3: 319–330.
75. Dixon JS. A study of the life history and food habits of mule deer in California. Sacramento, California, USA: California Fish and Game; 1934.
76. Linsdale JM, Tomich PQ. A herd of mule deer: a record of observations made on the Hastings Natural History Reservation. Berkeley, California, USA: University of California Press; 1953.
77. Farine DR. Proximity as a proxy for interactions: issues of scale in social network analysis. *Anim Behav.* 2015; 104: e1–e5.
78. Castles M, Heinsohn R, Marshall HH, Lee AEG, Cowlishaw G, Carter AJ. Social networks created with different techniques are not comparable. *Anim Behav.* 2014; 96: 59–67.
79. Powell JH, Kalinowski ST, Higgs MD, Ebinger MR, Vu NV, Cross PC. Microsatellites indicate minimal barriers to mule deer *Odocoileus hemionus* dispersal across Montana, USA. *Wildlife Biol.* 2013; 19(1): 102–110.
80. Cullingham CI, Merrill EH, Pybus MJ, Bollinger TK, Wilson GA, Coltman DW. Broad and fine-scale genetic analysis of white-tailed deer populations: estimating the relative risk of chronic wasting disease spread. *Evol Appl.* 2011; 4(1): 116–131. <https://doi.org/10.1111/j.1752-4571.2010.00142.x> PMID: [25567957](#)
81. Gear DA, Samuel MD, Scribner KT, Weckworth BV, Langenberg JA. Influence of genetic relatedness and spatial proximity on chronic wasting disease infection among female white-tailed deer. *J Appl Ecol.* 2010; 47(3): 532–540.
82. Magle SB, Samuel MD, Van Deelen TR, Robinson SJ, Mathews NE. Evaluating spatial overlap and relatedness of white-tailed deer in a chronic wasting disease management zone. *PLoS ONE.* 2013; 8(2): e56568. <https://doi.org/10.1371/journal.pone.0056568> PMID: [23437171](#)
83. Miller BF, DeYoung RW, Campbell TA, Laseter BR, Ford WM, Miller KV. Fine-scale genetic and social structuring in a central Appalachian white-tailed deer herd. *J Mammal.* 2010; 91(3): 681–689.
84. Colson KE, Brinkman TJ, Person DK, Hundertmark KJ. Fine-scale social and spatial genetic structure in Sitka black-tailed deer. *Conserv Genet.* 2013; 14(2): 439–449.
85. Colson KE, White KS, Hundertmark KJ. Parturition site selection in moose (*Alces alces*): evidence for social structure. *J Mammal.* 2016; 97(3): 788–797.
86. Bonnot N, Gaillard JM, Coulon A, Galan M, Cosson JF, Delorme D, et al. No difference between the sexes in fine-scale spatial genetic structure of roe deer. *PLoS ONE.* 2011; 5(12): e14436.
87. Biosa D, Grignolio S, Sica N, Pagon N, Scandura M, Apollonio M. Do relatives like to stay closer? Spatial organization and genetic relatedness in a mountain roe deer population. *J Zool.* 2015; 296(1): 30–37.
88. Comer CE, Kilgo JC, D'Angelo GJ, Glenn TC, Miller KV. Fine-scale genetic structure and social organization in female white-tailed deer. *J Wildlife Manage.* 2005; 69(1): 332–344.
89. Best EC, Dwyer RG, Seddon JM, Goldizen AW. Associations are more strongly correlated with space use than kinship in female eastern grey kangaroos. *Anim Behav.* 2014; 89: 1–10.
90. Strickland K, Gardiner R, Schultz AJ, Frère CH. The social life of eastern water dragons: sex differences, spatial overlap and genetic relatedness. *Anim Behav.* 2014; 97(0): 53–61.
